# Supplementary material
Source: PubMed Central journal article supplement (PMC164678)

## Caco-2

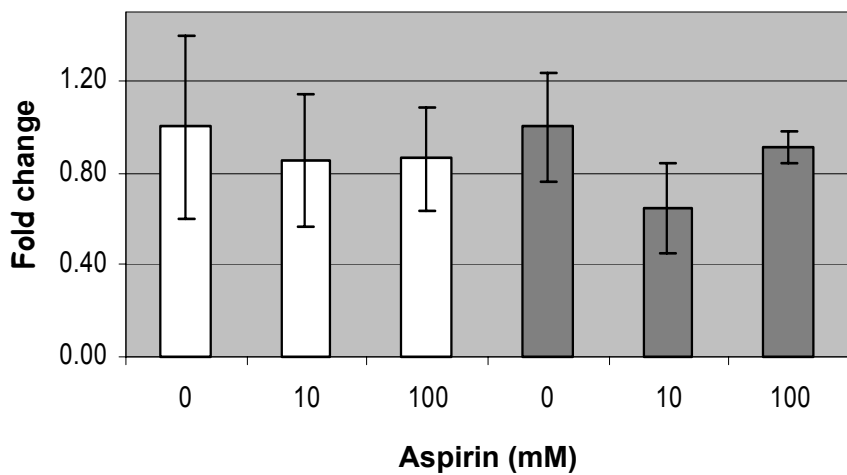

## HT29

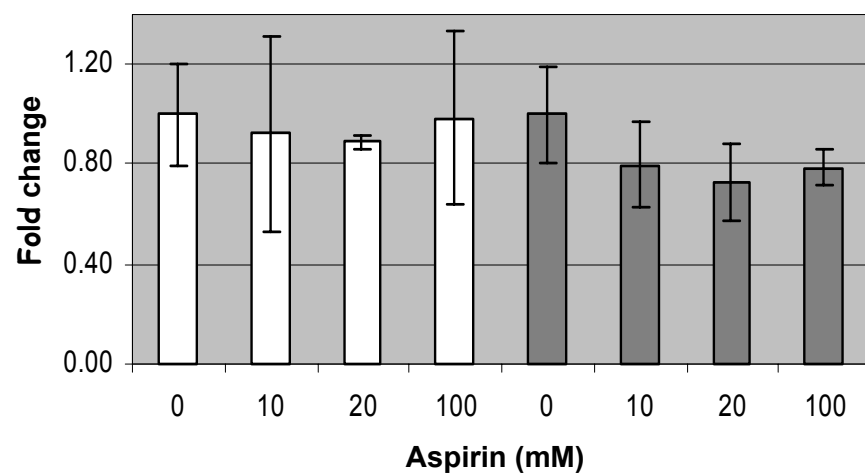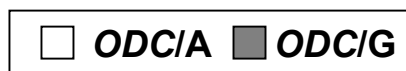

Supplement: pnas_1332465100_5.pdf [file pnas_1332465100_5.pdf]

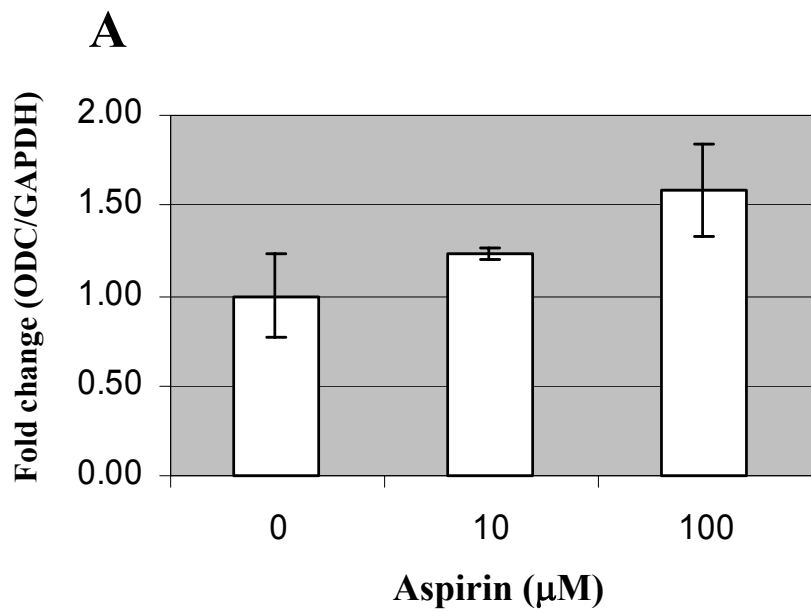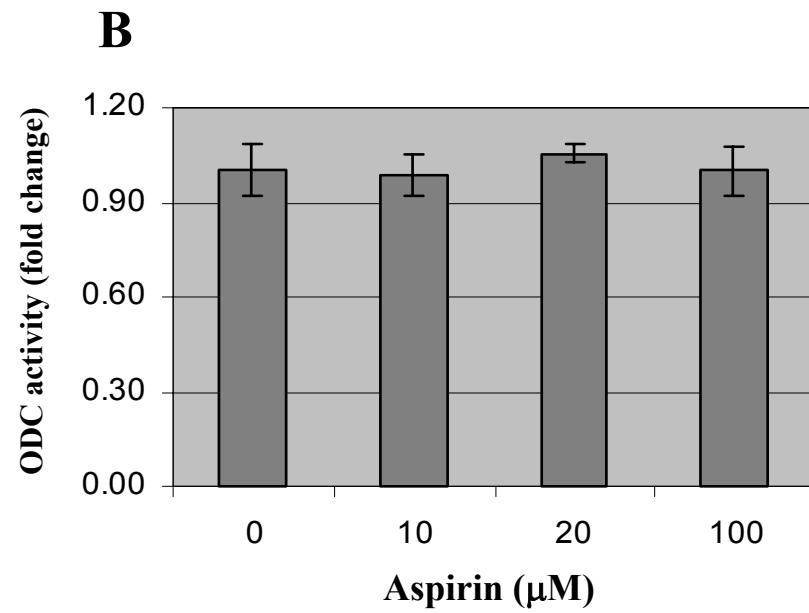

Supplement: pnas_1332465100_7.pdf [file pnas_1332465100_7.pdf]
